# Supplementary material for: Dual catalytic behavior of a soluble ferrocene as an electrocatalyst and in the electrochemistry for Na–air batteries
Source: Royal Society of Chemistry journal article supplement (doi:10.1039/c5ta04647e), 2015-01-01
Supplement: c5ta04647e1.pdf [file c5ta04647e1.pdf]

## Supporting information:

**Fig. S1** Cyclic performance of the CNT@Ni electrodes in different concentrations of  $\text{Fe}(\text{C}_5\text{H}_5)_2$ . (a) 0.03M (b) 0.50M  $\text{Fe}(\text{C}_5\text{H}_5)_2$ . The capacity was limited to 1000 mAh  $\text{g}^{-1}$  at the current density of 500 mA  $\text{g}^{-1}$ .

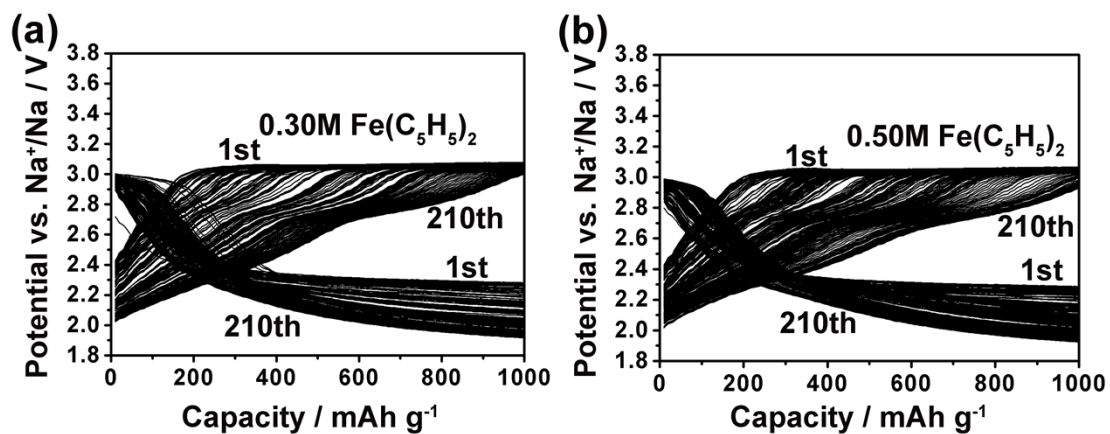

**Fig. S2** The selected discharge & charge profiles of the cell in  $\text{Fe}(\text{C}_5\text{H}_5)_2$ -containing electrolyte at the 1<sup>st</sup>, 50<sup>th</sup>, 150<sup>th</sup>, 200<sup>th</sup>, 230<sup>th</sup>, 250<sup>th</sup> cycles. The black line is 1<sup>st</sup> cycle; the red line is 50<sup>th</sup> cycle; the green line is 100<sup>th</sup> cycle; the blue line is 150<sup>th</sup> cycle; the rose red line is 200<sup>th</sup> cycle; the yellow line is 230<sup>th</sup> cycle; the purple line is 250<sup>th</sup> cycle (the capacity was limited to  $1000 \text{ mAh g}^{-1}$ ) at the current density of  $500 \text{ mA g}^{-1}$ .

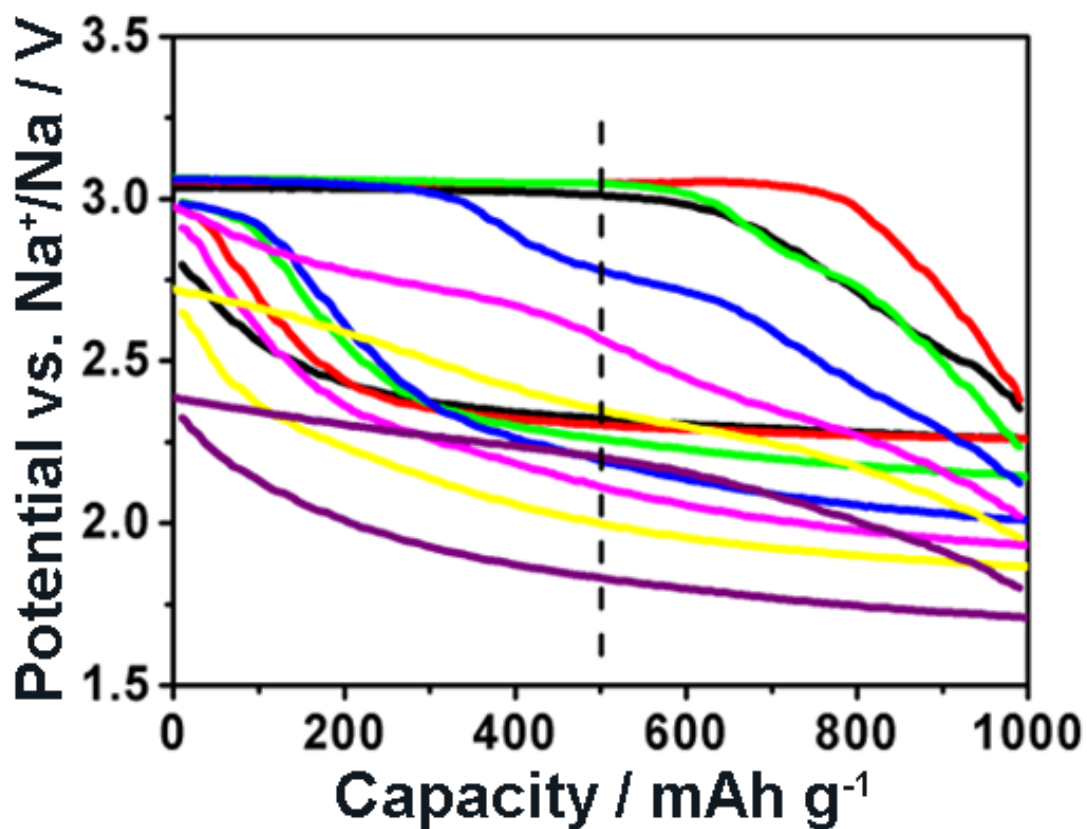

**Fig. S3** The UV absorption spectra of the electrolyte. By the reaction between  $\text{FeCl}_3$  and  $\text{Fe}(\text{C}_5\text{H}_5)_2$  in a faintly acid environment, we have obtained the solution containing 10mg/ml  $\text{Fe}(\text{C}_5\text{H}_5)_2^+$  (the black line). It can be seen that the absorbance of  $\text{Fe}(\text{C}_5\text{H}_5)_2^+$  at 619 nm decreases with the incremental amount of  $\text{Na}_2\text{O}_2$  (5mg, the red line; 10mg, the green line; 15mg, the blue line) into the electrolytes containing  $\text{Fe}(\text{C}_5\text{H}_5)_2^+$ .

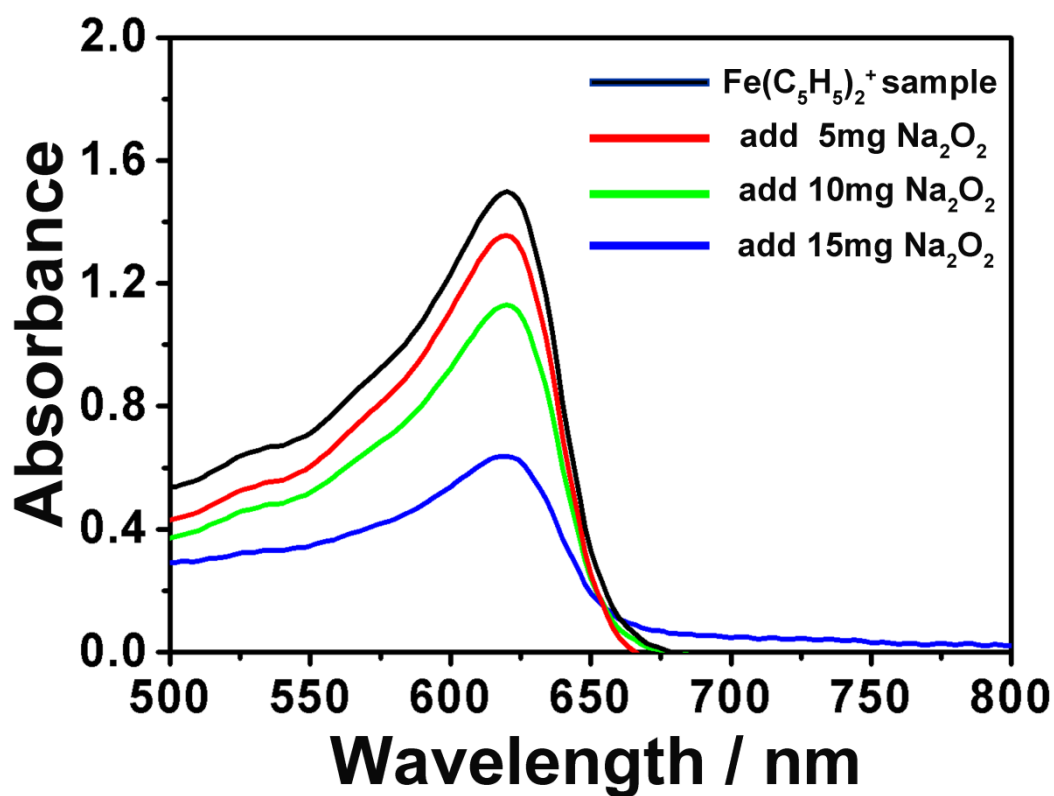

**Table S1** the ORR and OER catalytic activity of Na-air batteries reported recently

| Battery system | Discharge product               | Air cathode                      | Voltage of ORR<br>(vs.Na <sup>+</sup> /Na/V) | Voltage of OER<br>(vs.Na <sup>+</sup> /Na/V) | Reference |
|----------------|---------------------------------|----------------------------------|----------------------------------------------|----------------------------------------------|-----------|
| Na-air         | Na <sub>2</sub> O <sub>2</sub>  | DLC                              | 2.38-2.00                                    | 3.90                                         | 1         |
| Na-air         | Na <sub>2</sub> O <sub>2</sub>  | GNS                              | 2.10                                         | 4.20                                         | 2         |
| Na-air         | Na <sub>2</sub> O <sub>2</sub>  | CNT paper                        | 2.20                                         | 2.40                                         | 3         |
| Na-air         | Na <sub>2</sub> O <sub>2</sub>  | NiCo <sub>2</sub> O <sub>4</sub> | 2.15                                         | 3.00                                         | 4         |
| Na-air         | Na <sub>2</sub> O <sub>2</sub>  | CaMnO <sub>3</sub> /C            | 2.20                                         | 2.80                                         | 5         |
| Na-air         | NaO <sub>2</sub>                | GDL                              | 2.10                                         | 2.20                                         | 6-8       |
| Na-air         | NaO <sub>2</sub>                | Ketjenblack                      | 2.10                                         | 2.20                                         | 6         |
| Na-air         | NaO <sub>2</sub>                | VACNTs                           | 2.05                                         | 2.29                                         | 9         |
| Na-air         | Na <sub>2</sub> O <sub>2</sub>  | NCNT                             | 1.80                                         | 2.50                                         | 10        |
| Na-air         | Na <sub>2</sub> O <sub>2</sub>  |                                  |                                              |                                              |           |
| Na-air         | Na <sub>2</sub> CO <sub>3</sub> | Pt@GNS                           | 2.30                                         | 3.40                                         | 11        |
| Na-air         | Na <sub>2</sub> CO <sub>3</sub> | OMC-2.7                          | 2.01                                         | 3.26                                         | 12        |
| Na-air         | Na <sub>2</sub> CO <sub>3</sub> | Super P                          | 1.86                                         | 3.71                                         | 12        |
| Na-air         | Na <sub>2</sub> O <sub>2</sub>  | CNT@Ni                           | <b>2.10</b>                                  | <b>2.20-2.80</b>                             | This work |

**Note** DLC: diamond-like carbon thin films

GNS: graphene nanosheets

CNT: carbon nanotubes

GDL: carbon-fibre gas diffusion layer

VACNT: vertically aligned carbon nanotubes

NCNT: nitrogen-doped carbon nanotubes

OMC-2.7: ordered mesoporous carbon (pore size: 2.7nm)

### Reference

- 1 Q. Sun, Y. Yang, Z. W. Fu, *Electrochem Commun.*, 2012, **16**, 22-25.
- 2 W. Liu, Q. Sun, Y. Yang, J. Y. Xie and Z. W. Fu, *Chem. Commun.*, 2013, **49**, 1951-1953.
- 3 Z. Jian, Y. Chen, F. J. Li, T. Zhang, C. Liu and H. S. Zhou, *J. Power Sources.*, 2014, **251**, 466-469.
- 4 W. M. Liu, W. W. Yin, F. Ding, L. Sang and Z. W. Fu, *Electrochem Commun.*, 2014, **45**, 87-90.
- 5 Y. X. Hu, X. P. Han, Q. Zhao, J. Du, F. Y. Cheng and J. Chen, *J. Mater. Chem. A.*, 2015, **3**, 3320-3324.
- 6 C. L. Bender, P. Hartmann, M. Vracar, P. Adelhelm and J. Janek, *Adv. Energy Mater.*, 2014, **4**, 1301863.
- 7 P. Hartmann, C. L. Bender, M. Vraćar, A. K. Durr, A. Garsuch, J. Janek and P. Adelhelm, *Nat. Mater.*, 2013, **12**, 228-232.
- 8 P. Hartmann, C. L. Bender, J. Sann, A. K. Durr, M. Jansen, J. Janek and P.

- 
- Adelhelm, *Phys. Chem. Chem. Phys.*, 2013, **15**, 11661-11672.
- 9 N. Zhao, C. L. Li and X. X. Guo, *Phys. Chem. Chem. Phys.*, 2014, **16**, 15646-15652.
- 10 Q. Sun, H. Yadegari, M. N. Banis, J. Liu, B. W. Xiao, B. Q. Wang, S. Lawes, X. Li, R. Y. Li, X. L. Sun, *Nano Energy.*, 2015, **12**, 698-708.
- 11 S. P. Zhang, Z. Y. Wen, K. Rui, C. Shen, Y. Lu and J. H. Yang, *J. Mater. Chem. A.*, 2015, **3**, 2568-2571.
- 12 W. J. Kwak, Z. H. Chen, C. S. Yoon, J. K. Lee, K. Amine, Y. K. Sun, *Nano Energy.*, 2015, **12**, 123-130.
-
